# Supplementary material for: Dropouts and Compliance in Exercise Interventions Targeting Bone Mineral Density in Adults: A Meta-Analysis of Randomized Controlled Trials
Source: Hindawi journal article supplement (doi:10.1155/2013/250423), 2013-01-01
Supplement: f1 [file 250423.f1.pdf]

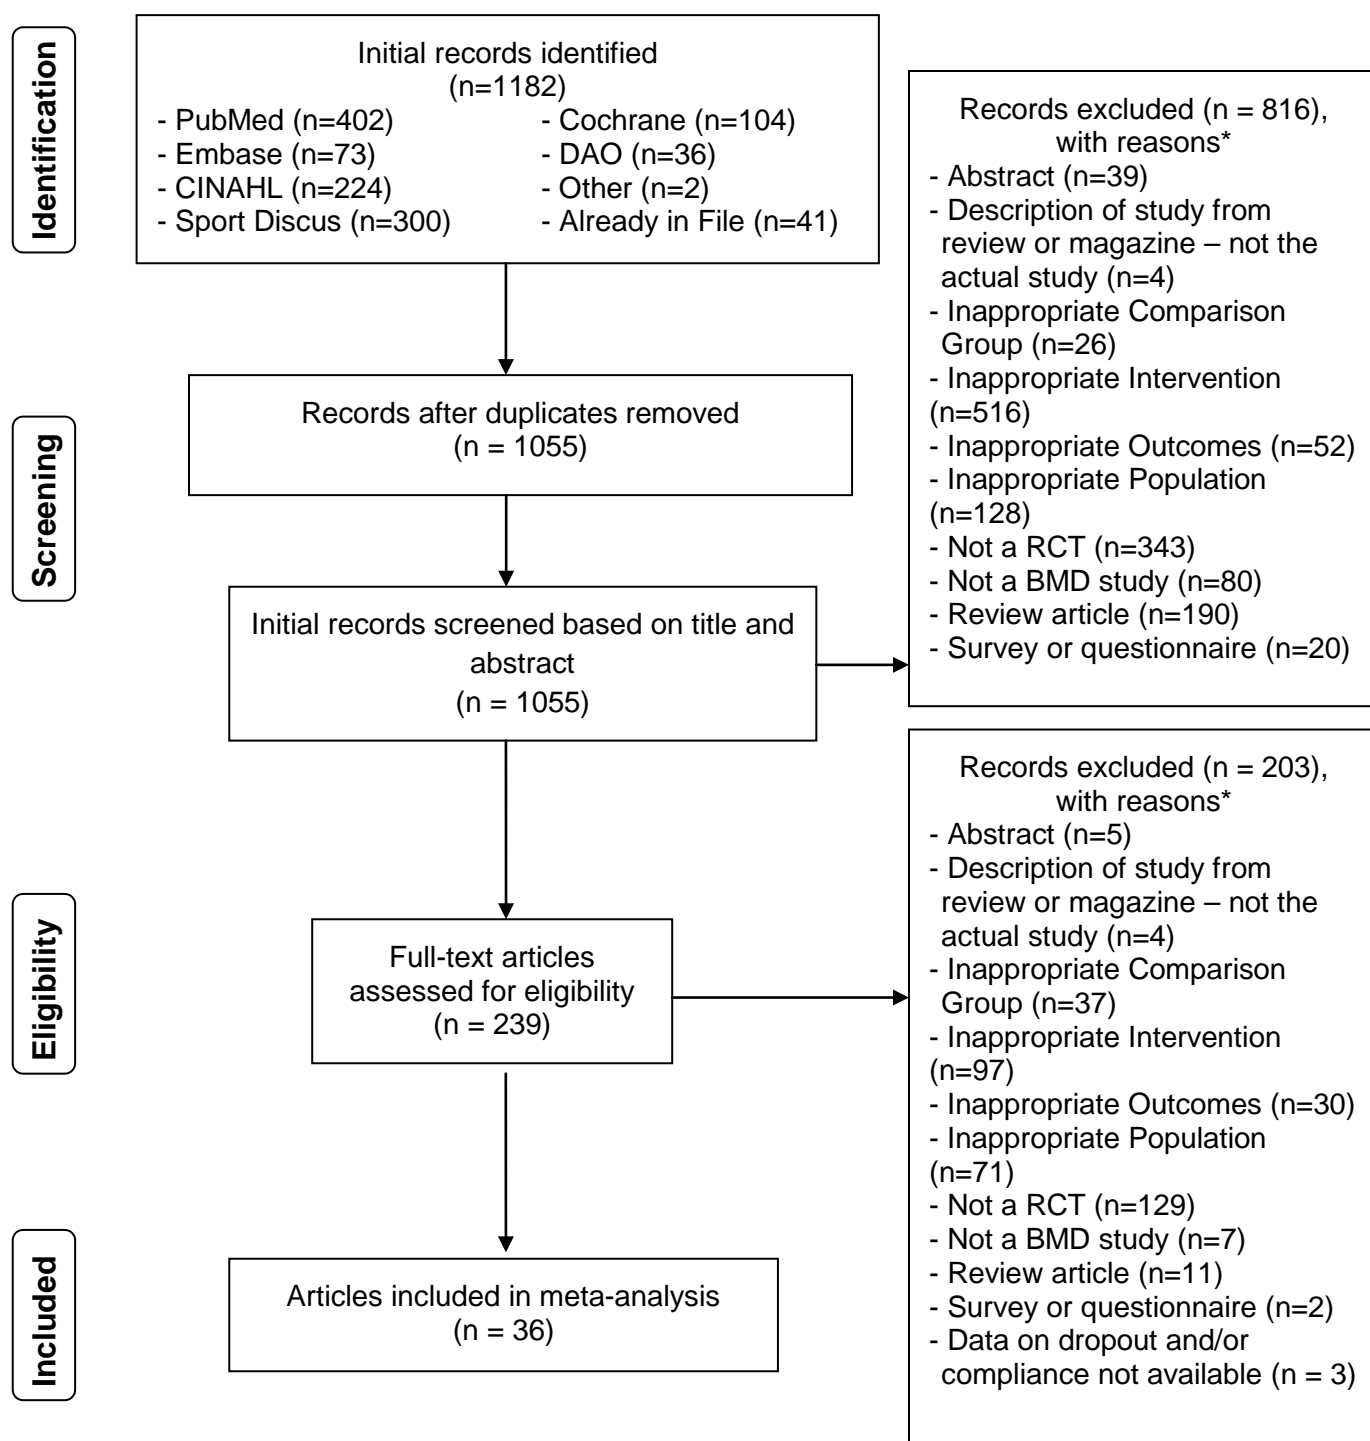

Supplementary File 1. Flow diagram for the selection of studies.
